# Supplementary material for: Hydrolysis of regenerated cellulose from ionic liquids and deep eutectic solvent over sulfonated carbon catalysts
Source: Royal Society of Chemistry journal article supplement (doi:10.1039/d2ra08224a), 2023-01-01
Supplement: d2ra08224a1.pdf [file d2ra08224a1.pdf]

**Supporting Information for**

**Hydrolysis of Regenerated Cellulose from Ionic  
Liquids and Deep Eutectic Solvent over Sulfonated  
Carbon Catalysts**

Han Ung Kim<sup>a</sup>, Jong Wha Kim<sup>a</sup>, Sumin Seo<sup>a</sup>, Jungho Jae<sup>a,\*</sup>

<sup>a</sup>School of Chemical Engineering, Pusan National University, Busan 46241, Republic of  
Korea

\*Corresponding author: Tel.: +82-51-510-2989; E-mail: [jh.jae@pusan.ac.kr](mailto:jh.jae@pusan.ac.kr) (J. Jae).

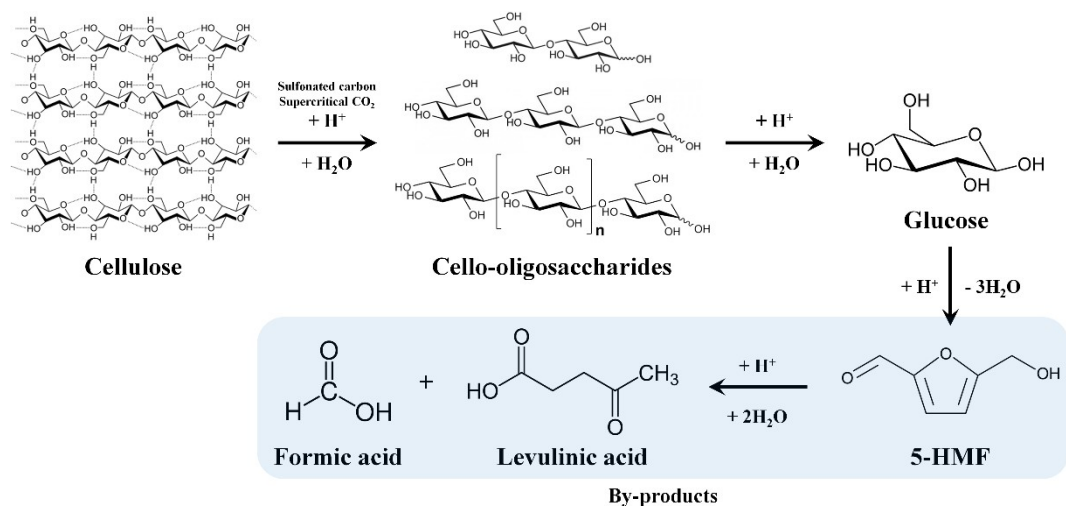

**Fig. S1.** The reaction network for the hydrolysis of cellulose.

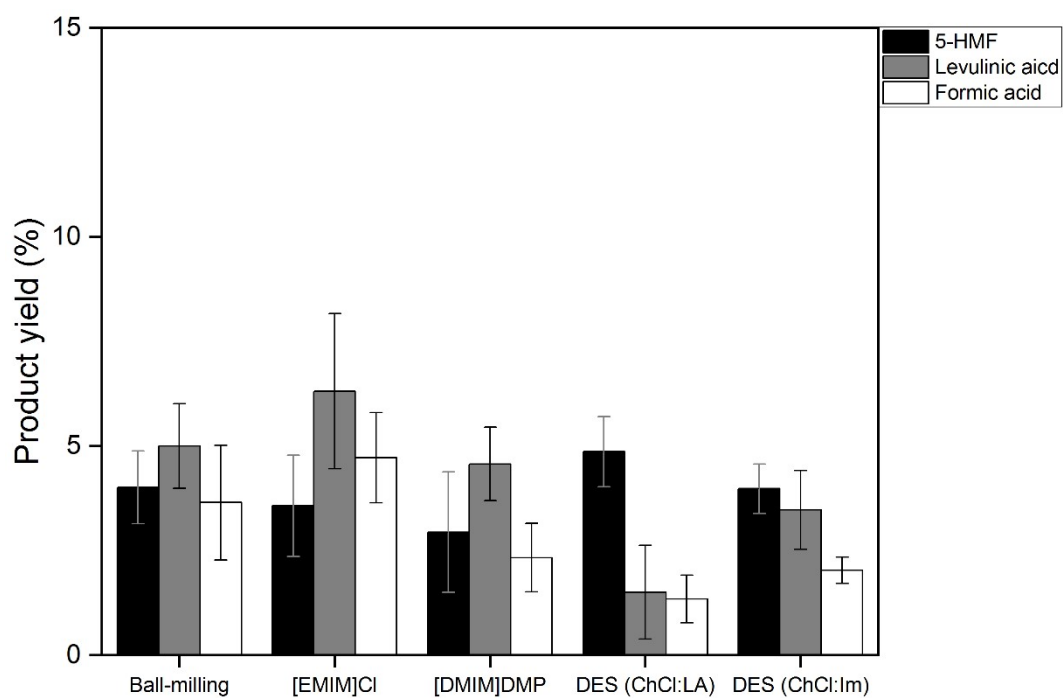

**Fig. S2.** The by-product distribution obtained from the cellulose hydrolysis (reaction condition: cellulose 0.05 g, catalyst 0.05 g, D.I. water 40 mL, Temp. 150 °C, Time 12 h).

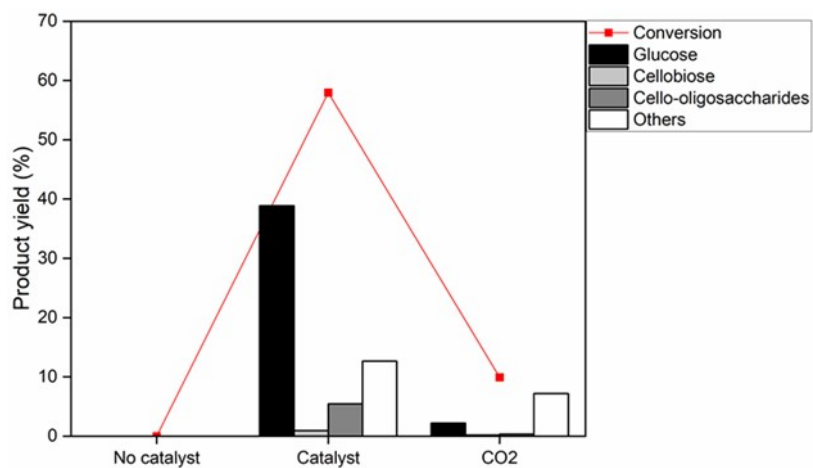

**Fig. S3.** Comparison of hydrolysis reactivity of the ball-milled cellulose without any catalyst and with only supercritical CO<sub>2</sub> (reaction conditions: cellulose 0.324 g, D.I. water 40 mL, Temp. 150 °C, Time 12 h, supercritical CO<sub>2</sub> injection 100 bar).

**Table S1.** Comparison of the hydrolysis activity of the DR process with those of other conventional processes.

| Catalyst                                        | Pre-treatment | Solvent                   | Temp. (K) | Time (h) | Glucose yield (%) | Ref.             |
|-------------------------------------------------|---------------|---------------------------|-----------|----------|-------------------|------------------|
| H <sub>3</sub> PW <sub>12</sub> O <sub>40</sub> | Ball-milling  | H <sub>2</sub> O          | 423       | 2        | 18                | 31               |
| H-beta zeolite                                  | Ball-milling  | H <sub>2</sub> O          | 423       | 24       | 12                | 32               |
| CMK-3-SO <sub>3</sub> H                         | Ball-milling  | H <sub>2</sub> O          | 423       | 24       | 74.5              | 15               |
| H <sub>3</sub> BW <sub>12</sub> O <sub>40</sub> | Ball-milling  | H <sub>2</sub> O          | 333       | 24       | 77                | 35               |
| AC-N-SO <sub>3</sub> H                          | Ball-milling  | H <sub>2</sub> O          | 423       | 24       | 62.6              | 15               |
| Amberlyst-15                                    | -             | [BMIM]Cl/H <sub>2</sub> O | 373       | 5        | 11                | 29               |
| HY zeolite                                      | -             | [BMIM]Cl                  | 403       | 2        | 50                | 34               |
| Nafion NR50                                     | [BMIM]Cl      | H <sub>2</sub> O          | 433       | 4        | 35                | 28               |
| AC-SO <sub>3</sub> H+CO <sub>2</sub>            | [EMIM]Cl      | H <sub>2</sub> O          | 423       | 12       | 80                | <b>This work</b> |

**Table S2.** Summary table of reaction results of the pretreated cellulose.

| Entry | Pre-treatment    | Conversion (%) | Yield (%) |            |                        |        |
|-------|------------------|----------------|-----------|------------|------------------------|--------|
|       |                  |                | Glucose   | Cellobiose | Cello-oligosaccharides | Others |
| 1     | Ball-milling     | 57.94          | 38.88     | 0.96       | 5.44                   | 12.66  |
| 2     | [EMIM]Cl         | 95.16          | 66.64     | 6.32       | 7.6                    | 14.6   |
| 3     | [DMIM]DMP        | 86.6           | 63.28     | 4.32       | 6.16                   | 12.84  |
| 4     | DES<br>(ChCl:LA) | 63.3           | 40.16     | 7.2        | 8.24                   | 7.7    |
| 5     | DES<br>(ChCl:Im) | 84.7           | 53.87     | 7.54       | 13.81                  | 9.48   |

reaction conditions: cellulose 0.05 g, catalyst 0.05 g, D.I. water 40 mL, Temp. 150 °C, Time 12 h.

**Table S3.** Summary table of reaction results of the pretreated cellulose with supercritical CO<sub>2</sub>.

| Entry | Pre-treatment    | Conversion (%) | Yield (%) |            |                        |        |
|-------|------------------|----------------|-----------|------------|------------------------|--------|
|       |                  |                | Glucose   | Cellobiose | Cello-oligosaccharides | Others |
| 1     | Ball-milling     | 98.67          | 70.74     | 0.2        | 0.38                   | 27.35  |
| 2     | [EMIM]Cl         | 99.9           | 82.61     | 0.68       | 5.6                    | 11.01  |
| 3     | [DMIM]DMP        | 99.9           | 76        | 1.01       | 8.81                   | 14.08  |
| 4     | DES<br>(ChCl:LA) | 99.9           | 62.16     | 3.8        | 15.24                  | 18.7   |
| 5     | DES<br>(ChCl:Im) | 99.9           | 69.89     | 2.09       | 10.61                  | 17.31  |

reaction conditions: cellulose 0.05 g, catalyst 0.05 g, D.I. water 40 mL, Temp. 150 °C, Time 12 h, supercritical CO<sub>2</sub> injection 100 bar.

**Table S4.** Summary table of by-products distribution from the hydrolysis of regenerated cellulose in the presence of supercritical CO<sub>2</sub>.

| Entry | Pre-treatment | Yield (%) |                |             |
|-------|---------------|-----------|----------------|-------------|
|       |               | 5-HMF     | Levulinic acid | Formic acid |
| 1     | Ball-milling  | 0.53      | 12.55          | 13.27       |
| 2     | [EMIM]Cl      | 0.22      | 6.23           | 4.56        |
| 3     | [DMIM]DMP     | 0.12      | 6.86           | 7.1         |
| 4     | DES (ChCl:LA) | 2.6       | 8.71           | 7.39        |
| 5     | DES (ChCl:Im) | 1.05      | 9.49           | 6.77        |

reaction conditions: cellulose 0.05 g, catalyst 0.05 g, D.I. water 40 mL, Temp. 150 °C, Time 12 h, supercritical CO<sub>2</sub> injection 100 bar.
